# Supplementary material for: Short-term beef consumption promotes systemic oxidative stress, TMAO formation and inflammation in rats, and dietary fat content modulates these effects
Source: Royal Society of Chemistry journal article supplement (doi:10.1039/c6fo00462h), 2016-01-01
Supplement: c6fo00462h1.pdf [file c6fo00462h1.pdf]

## ONLINE SUPPLEMENTARY MATERIAL

### Supplemental Table 1

|                 | Chicken |      | Beef |      | SEM  | P-values       |                |                  |
|-----------------|---------|------|------|------|------|----------------|----------------|------------------|
|                 | Lean    | Fat  | Lean | Fat  |      | P <sub>s</sub> | P <sub>f</sub> | P <sub>s×f</sub> |
| <b>Duodenum</b> | 3.6     | 3.6  | 3.4  | 3.8  | 0.16 | .895           | .186           | .201             |
| <b>Colon</b>    | 3.6     | 3.8  | 3.4  | 3.7  | 0.16 | .472           | .146           | .887             |
| <b>Heart</b>    | 13.9    | 13.7 | 13.3 | 13.6 | 0.37 | .267           | .780           | .485             |
| <b>Kidney</b>   | 17.4    | 18.7 | 18.2 | 18.9 | 0.83 | .486           | .169           | .634             |
| <b>Liver</b>    | 58.4    | 52.0 | 51.0 | 52.2 | 3.70 | .312           | .460           | .281             |
| <b>Brains</b>   | 0.94    | 0.99 | 0.99 | 0.93 | 0.03 | .837           | .864           | .078             |

Glutathion peroxidase ( $\mu\text{mol}/(\text{min.g})$ ) in selected organs of rats following 2 weeks consumption of the experimental diets. SEM= standard error of the mean, P<sub>s</sub> = P-value of the fixed factor protein source, P<sub>f</sub> = P-value of the fixed factor fat content, P<sub>s×f</sub> = P-value of the interaction term, P-values between 0.05 and 0.10 are highlighted in italic.

ONLINE SUPPLEMENTARY MATERIAL

Supplemental Table 2

|                    |         | Chicken           |                   | Beef              |                   | SEM   | P-values       |                 |                  |
|--------------------|---------|-------------------|-------------------|-------------------|-------------------|-------|----------------|-----------------|------------------|
|                    |         | Lean              | Fat               | Lean              | Fat               |       | P <sub>s</sub> | P <sub>f</sub>  | P <sub>s×f</sub> |
| <b>Total FA</b>    | g/100g  | 4.91 <sup>b</sup> | 8.10 <sup>a</sup> | 4.00 <sup>b</sup> | 7.13 <sup>a</sup> | 0.423 | <b>.043</b>    | <b>&lt;.001</b> | .938             |
| <b>SFA</b>         | g/100g  | 1.64 <sup>b</sup> | 2.47 <sup>a</sup> | 1.52 <sup>b</sup> | 2.28 <sup>a</sup> | 0.122 | .174           | <b>&lt;.001</b> | .711             |
| <b>MUFA</b>        | g/100g  | 1.71 <sup>b</sup> | 2.84 <sup>a</sup> | 1.22 <sup>b</sup> | 2.30 <sup>a</sup> | 0.193 | <b>.017</b>    | <b>&lt;.001</b> | .887             |
| <b>PUFA</b>        | g/100g  | 1.55 <sup>b</sup> | 2.76 <sup>a</sup> | 1.26 <sup>b</sup> | 2.54 <sup>a</sup> | 0.146 | .104           | <b>&lt;.001</b> | .792             |
| <b>LC n-3 PUFA</b> | mg/100g | 100 <sup>c</sup>  | 184 <sup>a</sup>  | 131 <sup>b</sup>  | 192 <sup>a</sup>  | 7.3   | <b>.015</b>    | <b>&lt;.001</b> | .141             |
| <b>DHA</b>         | mg/100g | 86 <sup>c</sup>   | 144 <sup>a</sup>  | 112 <sup>b</sup>  | 146 <sup>a</sup>  | 5.9   | <b>.019</b>    | <b>&lt;.001</b> | <b>.034</b>      |
| <b>ALA</b>         | mg/100g | 11 <sup>b</sup>   | 49 <sup>a</sup>   | 6 <sup>b</sup>    | 38 <sup>a</sup>   | 3.5   | <b>.032</b>    | <b>&lt;.001</b> | .379             |
| <b>LC n-6 PUFA</b> | mg/100g | 591 <sup>b</sup>  | 789 <sup>a</sup>  | 586 <sup>b</sup>  | 797 <sup>a</sup>  | 25.2  | .945           | <b>&lt;.001</b> | .805             |
| <b>LA</b>          | mg/100g | 851 <sup>b</sup>  | 1735 <sup>a</sup> | 538 <sup>b</sup>  | 1517 <sup>a</sup> | 172.8 | <b>.046</b>    | <b>&lt;.001</b> | .704             |

Liver fatty acid composition of rats following 2 weeks consumption of the experimental diets. Total FA = total fatty acids; SFA=saturated fatty acids; MUFA = monounsaturated fatty acids; PUFA = polyunsaturated fatty acids; LC n-3 PUFA = long chain n-3 polyunsaturated fatty acids (C20:5,n-3; C22:5,n-3; C22:6,n-3); DHA= docosahexaenoic acid; ALA =  $\alpha$ -linolenic acid (C18:3,n-3); LA = linoleic acid (C18:2,n-6); LC n-6 PUFA = Long chain n-6 polyunsaturated fatty acids (C20:4,n-6; C22:4,n-6; C22:5,n-6); FA = fatty acid; Different superscripts indicate significant differences ( $P < 0.05$ ) among diets. P<sub>s</sub> = P-value of the fixed factor protein source, P<sub>f</sub> = P-value of the fixed factor fat content, P<sub>h×f</sub> = P-value of the interaction term, P-values < 0.05 are highlighted in bold.
